# Supplementary material
Source: PubMed Central journal article supplement (PMC3993152)
Supplement: AEM.00062-14_zam999105237so1.pdf [file AEM.00062-14_zam999105237so1.pdf]

1 **Supplementary Table 1. Bacterial strains used in this study**

2

| Strain                                                      | Description                          | Host and Origin                                         | GenBank Acc. No. | Reference / source    |
|-------------------------------------------------------------|--------------------------------------|---------------------------------------------------------|------------------|-----------------------|
| <b><i>Pseudomonas syringae</i> pv. <i>actinidiae</i></b>    |                                      |                                                         |                  |                       |
| ICMP 9617                                                   |                                      | <i>A. deliciosa</i> , Japan, 1984                       |                  | ICMP <sup>B</sup>     |
| ICMP 9853                                                   |                                      | <i>Actinidia deliciosa</i> , Shizuoka, Japan, 1984      |                  | ICMP <sup>B</sup>     |
| ICMP 9855                                                   |                                      | <i>A. deliciosa</i> , Japan, 1984                       |                  | ICMP <sup>B</sup>     |
| ICMP 18708                                                  | V                                    | <i>Actinidia chinensis</i> , Te Puke, New Zealand, 2010 |                  | (1) ICMP <sup>B</sup> |
| ICMP 18743                                                  |                                      | <i>A. deliciosa</i> , Rome, Italy, 2010                 |                  | (1) ICMP <sup>B</sup> |
| ICMP 18744                                                  |                                      | <i>A. deliciosa</i> , Rome, Italy, 2010                 |                  | (1) ICMP <sup>B</sup> |
| ICMP 18745                                                  |                                      | <i>A. chinensis</i> , Latina, Italy, 2010               |                  | (1) ICMP <sup>B</sup> |
| ICMP 18746                                                  |                                      | <i>A. chinensis</i> , Latina, Italy, 2010               |                  | (1) ICMP <sup>B</sup> |
| ICMP 18800                                                  | V                                    | <i>A. deliciosa</i> , Paengaroa, New Zealand, 2010      |                  | ICMP <sup>B</sup>     |
| ICMP 18801                                                  | V                                    | <i>A. chinensis</i> , Te Puke, New Zealand, 2010        |                  | ICMP <sup>B</sup>     |
| ICMP 18885                                                  | V                                    | <i>A. chinensis</i> , Rangiuru, New Zealand, 2010       |                  | ICMP <sup>B</sup>     |
| ICMP 18886                                                  | V                                    | <i>A. deliciosa</i> , Te Puke, New Zealand, 2010        |                  | ICMP <sup>B</sup>     |
| ICMP 19071                                                  |                                      | <i>A. chinensis</i> , Korea, 1997                       |                  | ICMP <sup>B</sup>     |
| ICMP 19072                                                  |                                      | <i>A. chinensis</i> , Korea, 1997                       |                  | ICMP <sup>B</sup>     |
| ICMP 19079                                                  |                                      | <i>A. chinensis</i> , Italy, 2010                       |                  | ICMP <sup>B</sup>     |
| ICMP 19101                                                  | V                                    | <i>A. chinensis</i> , Te Puke, New Zealand, 2010        |                  | ICMP <sup>B</sup>     |
| ICMP 19104                                                  |                                      | <i>A. deliciosa</i> , Japan, 1988                       |                  | ICMP <sup>B</sup>     |
| NZ2V                                                        | V                                    | New Zealand                                             |                  | NZIPFR <sup>C</sup>   |
| NZ7V                                                        | V                                    | New Zealand                                             |                  | NZIPFR <sup>C</sup>   |
| NZ10V                                                       | V                                    | New Zealand                                             |                  | NZIPFR <sup>C</sup>   |
| <b><i>Pseudomonas syringae</i> pv. <i>actinidiae</i> LV</b> |                                      |                                                         |                  |                       |
| ICMP 18802                                                  | LV                                   | <i>A. chinensis</i> , Paengaroa, New Zealand, 2010      |                  | ICMP <sup>B</sup>     |
| ICMP 18803                                                  | LV                                   | <i>A. chinensis</i> , Hawkes Bay, New Zealand, 2010     |                  | (1) ICMP <sup>B</sup> |
| ICMP 18804                                                  | LV                                   | <i>A. chinensis</i> , Rangiuru, New Zealand, 2010       |                  | (1) ICMP <sup>B</sup> |
| ICMP 18806                                                  | LV                                   | <i>A. chinensis</i> , Pongakawa, New Zealand, 2010      |                  | ICMP <sup>B</sup>     |
| ICMP 18807                                                  | LV                                   | <i>A. deliciosa</i> , Tauranga, New Zealand, 2010       |                  | ICMP <sup>B</sup>     |
| ICMP 18882                                                  | LV                                   | <i>A. chinensis</i> , Motueka, New Zealand, 2010        |                  | (1) ICMP <sup>B</sup> |
| ICMP 18883                                                  | LV                                   | <i>A. deliciosa</i> , Golden Bay, New Zealand, 2010     |                  | (1) ICMP <sup>B</sup> |
| ICMP 19497                                                  | LV                                   | <i>A. chinensis</i> , Te Puke, New Zealand, 2010        |                  | ICMP <sup>B</sup>     |
| <b><i>Actinidia</i> associated bacteria</b>                 |                                      |                                                         |                  |                       |
| ABAC1 <sup>A</sup>                                          | <i>P. syringae</i> sp.               | <i>Actinidia</i> , New Zealand                          | KF003372         | NZIPFR <sup>C</sup>   |
| ABAC2 <sup>A</sup>                                          | <i>Curtobacterium flaccumfaciens</i> | <i>Actinidia</i> , New Zealand                          | KF003373         | NZIPFR <sup>C</sup>   |
| ABAC5 <sup>A</sup>                                          | <i>Acinetobacter radioresistens</i>  | <i>Actinidia</i> , New Zealand                          | KF003374         | NZIPFR <sup>C</sup>   |
| ABAC8 <sup>A</sup>                                          | <i>P. putida</i>                     | <i>Actinidia</i> , New Zealand                          | KF003375         | NZIPFR <sup>C</sup>   |

|                      |                                             |                                |          |                     |
|----------------------|---------------------------------------------|--------------------------------|----------|---------------------|
| ABAC9 <sup>A</sup>   | <i>P. syringae</i> pv.<br><i>actinidiae</i> | <i>Actinidia</i> , New Zealand | KF003376 | NZIPFR <sup>C</sup> |
| ABAC10 <sup>A</sup>  | <i>P. syringae</i> sp.                      | <i>Actinidia</i> , New Zealand | DQ318861 | NZIPFR <sup>C</sup> |
| ABAC13 <sup>A</sup>  | <i>Pseudomonas</i> sp.                      | <i>Actinidia</i> , New Zealand | KF003378 | NZIPFR <sup>C</sup> |
| ABAC15 <sup>A</sup>  | <i>Bacillus</i> sp.                         | <i>Actinidia</i> , New Zealand | KF003379 | NZIPFR <sup>C</sup> |
| ABAC16 <sup>A</sup>  | <i>Achromobacter</i> sp.                    | <i>Actinidia</i> , New Zealand | KF003380 | NZIPFR <sup>C</sup> |
| ABAC17 <sup>A</sup>  | <i>Pseudomonas</i> sp.                      | <i>Actinidia</i> , New Zealand | KF003381 | NZIPFR <sup>C</sup> |
| ABAC18 <sup>A</sup>  | <i>Pantoea agglomerans</i>                  | <i>Actinidia</i> , New Zealand | KF003382 | NZIPFR <sup>C</sup> |
| ABAC19 <sup>A</sup>  | <i>P. agglomerans</i>                       | <i>Actinidia</i> , New Zealand | KF003383 | NZIPFR <sup>C</sup> |
| ABAC20 <sup>A</sup>  | <i>Bacillus</i><br><i>amyloliquefaciens</i> | <i>Actinidia</i> , New Zealand | KF003384 | NZIPFR <sup>C</sup> |
| ABAC21 <sup>A</sup>  | <i>Pseudomonas</i> sp.                      | <i>Actinidia</i> , New Zealand | KF003385 | NZIPFR <sup>C</sup> |
| ABAC22 <sup>A</sup>  | <i>P. agglomerans</i>                       | <i>Actinidia</i> , New Zealand | KF003386 | NZIPFR <sup>C</sup> |
| ABAC23 <sup>A</sup>  | <i>P. agglomerans</i>                       | <i>Actinidia</i> , New Zealand | KF003387 | NZIPFR <sup>C</sup> |
| ABAC24 <sup>A</sup>  | <i>Pseudomonas</i> sp.                      | <i>Actinidia</i> , New Zealand | KF003388 | NZIPFR <sup>C</sup> |
| ABAC25 <sup>A</sup>  | <i>P. agglomerans</i>                       | <i>Actinidia</i> , New Zealand | KF003389 | NZIPFR <sup>C</sup> |
| ABAC26 <sup>A</sup>  | <i>B. amyloliquefaciens</i>                 | <i>Actinidia</i> , New Zealand | KF003390 | NZIPFR <sup>C</sup> |
| ABAC27 <sup>A</sup>  | <i>B. amyloliquefaciens</i>                 | <i>Actinidia</i> , New Zealand | KF003391 | NZIPFR <sup>C</sup> |
| ABAC28 <sup>A</sup>  | <i>B. amyloliquefaciens</i>                 | <i>Actinidia</i> , New Zealand | KF003392 | NZIPFR <sup>C</sup> |
| ABAC29 <sup>A</sup>  | <i>Bacillus</i> sp.                         | <i>Actinidia</i> , New Zealand | KF003393 | NZIPFR <sup>C</sup> |
| ABAC35 <sup>A</sup>  | <i>Bacillus</i> sp.                         | <i>Actinidia</i> , New Zealand | KF003394 | NZIPFR <sup>C</sup> |
| ABAC36 <sup>A</sup>  | <i>B. amyloliquefaciens</i>                 | <i>Actinidia</i> , New Zealand | KF003395 | NZIPFR <sup>C</sup> |
| ABAC39 <sup>A</sup>  | <i>P. fluorescens</i>                       | <i>Actinidia</i> , New Zealand | KF003396 | NZIPFR <sup>C</sup> |
| ABAC41 <sup>A</sup>  | <i>Bacillus cereus</i>                      | <i>Actinidia</i> , New Zealand | KF003397 | NZIPFR <sup>C</sup> |
| ABAC43 <sup>A</sup>  | <i>P. viridiflava</i>                       | <i>Actinidia</i> , New Zealand | KF003398 | NZIPFR <sup>C</sup> |
| ABAC45 <sup>A</sup>  | <i>Williamsia</i> sp.                       | <i>Actinidia</i> , New Zealand | KF003399 | NZIPFR <sup>C</sup> |
| ABAC46 <sup>A</sup>  | <i>Rhodococcus</i> sp.                      | <i>Actinidia</i> , New Zealand | KF003400 | NZIPFR <sup>C</sup> |
| ABAC53 <sup>A</sup>  | <i>Stenotrophomonas</i> sp.                 | <i>Actinidia</i> , New Zealand | KF003401 | NZIPFR <sup>C</sup> |
| ABAC54 <sup>A</sup>  | <i>Sphingobacterium</i> sp.                 | <i>Actinidia</i> , New Zealand | KF003402 | NZIPFR <sup>C</sup> |
| ABAC57 <sup>A</sup>  | <i>Sphingobacterium</i> sp.                 | <i>Actinidia</i> , New Zealand | KF003403 | NZIPFR <sup>C</sup> |
| ABAC58 <sup>A</sup>  | <i>Kocuria marina</i>                       | <i>Actinidia</i> , New Zealand | KF003404 | NZIPFR <sup>C</sup> |
| ABAC59 <sup>A</sup>  | <i>Rhizobium</i> sp.                        | <i>Actinidia</i> , New Zealand | KF003405 | NZIPFR <sup>C</sup> |
| ABAC60 <sup>A</sup>  | <i>P. fluorescens</i>                       | <i>Actinidia</i> , New Zealand | KF003406 | NZIPFR <sup>C</sup> |
| ABAC61 <sup>A</sup>  | <i>Pseudomonas</i> sp.                      | <i>Actinidia</i> , New Zealand | KF003407 | NZIPFR <sup>C</sup> |
| ABAC62 <sup>A</sup>  | <i>P. fluorescens</i>                       | <i>Actinidia</i> , New Zealand | KF003408 | NZIPFR <sup>C</sup> |
| ABAC63 <sup>A</sup>  | <i>Pseudomonas</i> sp.                      | <i>Actinidia</i> , New Zealand | KF003409 | NZIPFR <sup>C</sup> |
| ABAC64 <sup>A</sup>  | <i>P. agglomerans</i>                       | <i>Actinidia</i> , New Zealand | KF003410 | NZIPFR <sup>C</sup> |
| ABAC65 <sup>A</sup>  | <i>Pantoea</i> sp.                          | <i>Actinidia</i> , New Zealand | KF003411 | NZIPFR <sup>C</sup> |
| ABAC66 <sup>A</sup>  | <i>C. flaccumfaciens</i>                    | <i>Actinidia</i> , New Zealand | KF003412 | NZIPFR <sup>C</sup> |
| ABAC68 <sup>A</sup>  | <i>C. flaccumfaciens</i>                    | <i>Actinidia</i> , New Zealand | KF003413 | NZIPFR <sup>C</sup> |
| ABAC69 <sup>A</sup>  | <i>Rhizobium</i> sp.                        | <i>Actinidia</i> , New Zealand | KF003414 | NZIPFR <sup>C</sup> |
| ABAC71 <sup>A</sup>  | <i>C. flaccumfaciens</i>                    | <i>Actinidia</i> , New Zealand | KF003415 | NZIPFR <sup>C</sup> |
| ABAC72 <sup>A</sup>  | <i>P. syringae</i> sp.                      | <i>Actinidia</i> , New Zealand | KF003416 | NZIPFR <sup>C</sup> |
| ABAC76 <sup>A</sup>  | <i>Pantoea</i> sp.                          | <i>Actinidia</i> , New Zealand | KF003417 | NZIPFR <sup>C</sup> |
| ABAC77 <sup>A</sup>  | <i>P. agglomerans</i>                       | <i>Actinidia</i> , New Zealand | KF003418 | NZIPFR <sup>C</sup> |
| ABAC78 <sup>A</sup>  | <i>Enterobacter</i> sp.                     | <i>Actinidia</i> , New Zealand | KF003419 | NZIPFR <sup>C</sup> |
| ABAC79A <sup>A</sup> | <i>P. syringae</i> pv.<br><i>actinidiae</i> | <i>Actinidia</i> , New Zealand | KF003420 | NZIPFR <sup>C</sup> |
| ABAC79B <sup>A</sup> | <i>P. syringae</i> pv.<br><i>actinidiae</i> | <i>Actinidia</i> , New Zealand | KF003421 | NZIPFR <sup>C</sup> |

#### *Pseudomonas aeruginosa*

|      |                      |     |
|------|----------------------|-----|
| PA01 |                      | (2) |
| P1   | Pyocin typing strain | (3) |
| P11  | Pyocin typing strain | (3) |
| P13  | Pyocin typing strain | (3) |
| P14  | Pyocin typing strain | (3) |
| P15  | Pyocin typing strain | (3) |

| P19                                     | Pyocin typing strain   |                                                          | (3)                          |
|-----------------------------------------|------------------------|----------------------------------------------------------|------------------------------|
| <b><i>Pseudomonas corrugata</i></b>     |                        |                                                          |                              |
| ICMP 5819                               |                        | <i>Solanum lycopersicum</i> , United Kingdom, 1972       | ICMP <sup>B</sup>            |
| ICMP 7634                               |                        | <i>S. lycopersicum</i> , Oamaru, New Zealand             | ICMP <sup>B</sup>            |
| ICMP 8266                               |                        | <i>S. lycopersicum</i> , United Kingdom, 1972            | ICMP <sup>B</sup>            |
| ICMP 8270                               |                        | <i>Medicago sativa</i> , USA, 1975                       | ICMP <sup>B</sup>            |
| ICMP 8633                               |                        | <i>S. lycopersicum</i> , South Africa, 1981              | ICMP <sup>B</sup>            |
| ICMP 8889                               |                        | <i>S. lycopersicum</i> , Auckland, New Zealand, 1982     | ICMP <sup>B</sup>            |
| ICMP 8894                               |                        | <i>S. lycopersicum</i> , Lincoln, New Zealand, 1982      | ICMP <sup>B</sup>            |
| ICMP 9849                               |                        | <i>S. lycopersicum</i> , Chiba, Japan, 1982              | ICMP <sup>B</sup>            |
| ICMP 10135                              |                        | <i>S. lycopersicum</i> , Brazil                          | ICMP <sup>B</sup>            |
| ICMP 10862                              |                        | <i>Capsicum annuum</i> , Tenerife, Spain, 1984           | ICMP <sup>B</sup>            |
| <b><i>Pseudomonas fluorescens</i></b>   |                        |                                                          |                              |
| 46A                                     |                        | New Zealand                                              | NZIPFR <sup>C</sup>          |
| ICMP 3636                               |                        | <i>A. deliciosa</i> , Te Puke, New Zealand, 1970         | ICMP <sup>B</sup>            |
| ICMP 7279                               |                        | <i>Allium cepa</i> , Puni, New Zealand, 1980             | ICMP <sup>B</sup>            |
| ICMP 11288                              |                        | <i>A. deliciosa</i> , Kumeu, New Zealand, 1991           | ICMP <sup>B</sup>            |
| SBW25                                   |                        | Sugar beet leaf, United Kingdom, 1992                    | (4) NZIPFR <sup>C</sup>      |
| Blight Ban                              |                        | Biocontrol strain                                        | Nufarm Americas Inc          |
| A506                                    |                        |                                                          |                              |
| <b>Other <i>Pseudomonas</i> strains</b> |                        |                                                          |                              |
| ICMP 9505                               | <i>P. marginalis</i>   | <i>A. deliciosa</i> , Te Puke, New Zealand, 1987         | ICMP <sup>B</sup>            |
| ICMP 11289                              | <i>P. marginalis</i>   | <i>A. deliciosa</i> , Kumeu, New Zealand, 1991           | ICMP <sup>B</sup>            |
| ICMP 3272                               | <i>Pseudomonas</i>     | <i>A. deliciosa</i> , Riverhead, New Zealand, 1971       | ICMP <sup>B</sup>            |
| ICMP 10191                              | <i>Pseudomonas</i>     | <i>Actinidia</i> , Changsha, China, 1981                 | ICMP <sup>B</sup>            |
| PS2.1 <sup>A</sup>                      | <i>Pseudomonas</i> sp. | <i>Prunus avium</i> , New Zealand, 2009                  | KF019106 NZIPFR <sup>C</sup> |
| PS4.1 <sup>A</sup>                      | <i>Pseudomonas</i> sp. | <i>Prunus persica</i> , Central Otago, New Zealand, 2009 | KF019107 NZIPFR <sup>C</sup> |
| PS5.1 <sup>A</sup>                      | <i>Pseudomonas</i> sp. | <i>P. persica</i> , Central Otago, New Zealand, 2009     | KF019108 NZIPFR <sup>C</sup> |
| ICMP 19500                              | <i>Pseudomonas</i> sp. | <i>A. chinensis</i> , Kerikeri, New Zealand, 2011        | ICMP <sup>B</sup>            |
| ICMP 11168                              | <i>P. syringae</i>     | <i>A. deliciosa</i> , Katikati, New Zealand, 1991        | ICMP <sup>B</sup>            |
| ICMP 11292                              | <i>P. syringae</i>     | <i>A. deliciosa</i> , New Zealand, 1991                  | ICMP <sup>B</sup>            |
| ICMP 11293                              | <i>P. syringae</i>     | <i>A. deliciosa</i> , Kumeu, New Zealand, 1991           | ICMP <sup>B</sup>            |
| ICMP 13102                              | <i>P. syringae</i>     | <i>A. deliciosa</i> , Livron sur Drome, France, 1985     | ICMP <sup>B</sup>            |
| ICMP 19498                              | <i>P. syringae</i>     | <i>A. chinensis</i> , Te Puke, New Zealand, 2010         | ICMP <sup>B</sup>            |
| PS10.1 <sup>A</sup>                     | <i>P. syringae</i>     | <i>A. deliciosa</i> , Te Puke, New Zealand, 2010         | KF019101 NZIPFR <sup>C</sup> |
| ICMP 19499                              | <i>P. syringae</i>     | <i>A. chinensis</i> , Te Puke, New Zealand, 2011         | ICMP <sup>B</sup>            |
| PS12.1 <sup>A</sup>                     | <i>P. syringae</i>     | <i>A. deliciosa</i> , Te Puke, New Zealand, 2011         | KF019102 NZIPFR <sup>C</sup> |

|                                    |                                            |                                                                    |          |                        |
|------------------------------------|--------------------------------------------|--------------------------------------------------------------------|----------|------------------------|
|                                    |                                            | 2011                                                               |          |                        |
| ICMP 4394                          | <i>P. syringae</i> pv. <i>atrofaciens</i>  | <i>Triticum aestivum</i> , Auckland, New Zealand, 1968             |          | ICMP <sup>B</sup>      |
| PS1.1 <sup>A</sup>                 | <i>P. syringae</i> pv. <i>morsprunorum</i> | <i>Prunus avium</i> , Central Otago, New Zealand, 2008             | KF019104 | NZIPFR <sup>C</sup>    |
| PS6.1 <sup>A</sup>                 | <i>P. syringae</i> pv. <i>morsprunorum</i> | <i>P. avium</i> , Central Otago, New Zealand, 2009                 | KF019105 | NZIPFR <sup>C</sup>    |
| 1448A                              | <i>P. syringae</i> pv. <i>phaseolicola</i> | <i>Phaseolus vulgaris</i> , Ethiopia, 1985                         |          | NZIPFR <sup>C</sup>    |
| PS3.1 <sup>A</sup>                 | <i>P. syringae</i> pv. <i>syringae</i>     | <i>P. persica</i> , Central Otago, New Zealand, 2010               | KF019109 | NZIPFR <sup>C</sup>    |
| PS7.1 <sup>A</sup>                 | <i>P. syringae</i> pv. <i>syringae</i>     | <i>P. avium</i> , Central Otago, New Zealand, 2009                 | KF019103 | NZIPFR <sup>C</sup>    |
| PD2766                             | <i>P. syringae</i> pv. <i>syringae</i>     | USA                                                                |          | ICMP <sup>B</sup>      |
| PD2774                             | <i>P. syringae</i> pv. <i>syringae</i>     | USA                                                                |          | ICMP <sup>B</sup>      |
| ICMP 19090 (NCPBP3871)             | <i>P. syringae</i> pv. <i>syringae</i>     | <i>A. deliciosa</i> , Latina, Italy, 1992                          |          | (1) ICMP <sup>B</sup>  |
| DC3000                             | <i>P. syringae</i> pv. <i>tomato</i>       | Mutant of NCPBP 1106, <i>Licopersicon esculentum</i> , UK          |          | (5) NCPBP <sup>D</sup> |
| ICMP 13104                         | <i>P. viridiflava</i>                      | <i>A. deliciosa</i> , Begrolles en Mauges, France, 1985            |          | ICMP <sup>B</sup>      |
| ICMP 13303                         | <i>P. viridiflava</i>                      | <i>A. chinensis</i> , Te Puke, New Zealand, 1996                   |          | ICMP <sup>B</sup>      |
| <b>Other Gram-negative strains</b> |                                            |                                                                    |          |                        |
| DBS100                             | <i>Citrobacter rodentium</i>               | Gastrointestinal mouse pathogen                                    |          | (6)                    |
| AB259                              | <i>Escherichia coli</i>                    | Genotype: Hfr (PO1) <i>relA1 spoT1 thi-1</i>                       |          | (7)                    |
| ATCC 39006                         | <i>Serratia</i> sp.                        | Salt marsh, Cheesequake, New Jersey, USA, 1982                     |          | (8, 9)                 |
| SCRI1043                           | <i>Pectobacterium atrosepticum</i>         | Potato, Perthshire, Scotland, 1985                                 |          | (10)                   |
| Blossom Bless                      | <i>P. agglomerans</i>                      | Biocontrol strain                                                  |          | Grow-Chem NZ Ltd       |
| ICMP 18800 TnKm12                  | <i>P. syringae</i> pv. <i>actinidiae</i>   | Unmapped Tn-DS1028lacZKm mutant                                    |          | This work              |
| BW20767                            | <i>E. coli</i> , pKRCPN1                   | Donor strain for Tn mutagenesis, Tc <sup>R</sup> , Km <sup>R</sup> |          | (11)                   |

3  
4  
5  
6  
7  
8  
9  
10  
11  
12  
13  
14  
15

<sup>A</sup> Isolate described by comparison of 16S rDNA sequence with those in the Genbank database.

<sup>B</sup> Isolates obtained from the International Collection of Microorganisms from Plants (ICMP)

<http://www.landcareresearch.co.nz/resources/collections/icmp>

<sup>C</sup> Isolates obtained from The New Zealand Institute for Plant & Food Research Ltd (NZIPFR) culture collection.

<sup>D</sup> Isolates obtained from the National Collection of Plant Pathogenic Bacteria (NCPBP) <http://www.ncppb.com/>

16 **References**

- 17 1. **Chapman JR, Taylor RK, Weir BS, Romberg MK, Vanneste JL, Luck J, Alexander**  
18 **BJR.** 2012. Phylogenetic relationships among global populations of *Pseudomonas*  
19 *syringae* pv. *actinidiae*. *Phytopathol.* **102**:1034-1044.
- 20 2. **Holloway BW.** 1955. Genetic recombination in *Pseudomonas aeruginosa*. *Microbiol.*  
21 **13**:572-581.
- 22 3. **Ziv G, Mushin R, Tagg JR.** 1971. Pyocine typing as an epidemiological marker in  
23 *Pseudomonas aeruginosa* mastitis in cattle. *J. Hygiene.* **69**:171-177.
- 24 4. **Bailey MJ, Lilley AK, Thompson IP, Rainey PB, Ellis RJ.** 1995. Site directed  
25 chromosomal marking of a fluorescent pseudomonad isolated from the phytosphere of  
26 sugar beet; stability and potential for marker gene transfer. *Mol. Ecol.* **4**:755-763.
- 27 5. **Cuppels DA.** 1986. Generation and characterization of Tn5 insertion mutations in  
28 *Pseudomonas syringae* pv. *tomato*. *Appl. Environ. Microbiol.* **51**:323-327.
- 29 6. **Schauer DB, Zabel BA, Pedraza IF, O'Hara CM, Steigerwalt AG, Brenner DJ.** 1995.  
30 Genetic and biochemical characterization of *Citrobacter rodentium* sp. nov. *J. Clin.*  
31 *Microbiol.* **33**:2064-2068.
- 32 7. **Kang S, Markovitz A.** 1967. Induction of capsular polysaccharide synthesis by rho-  
33 fluorophenylalanine in *Escherichia coli* wild type and strains with altered  
34 phenylalanyl soluble ribonucleic acid synthetase. *J. Bacteriol.* **93**:584-591.
- 35 8. **Parker WL, Rathnum ML, Wells JS, Jr., Trejo WH, Principe PA, Sykes RB.** 1982.  
36 SQ 27,860, a simple carbapenem produced by species of *Serratia* and *Erwinia*. *J.*  
37 *Antibiot. (Tokyo).* **35**:653-660.
- 38 9. **Fineran PC, Iglesias Cans MC, Ramsay JP, Wilf NM, Cossyleon D, McNeil MB,**  
39 **Williamson NR, Monson RE, Becher SA, Stanton J-AL, Brügger K, Brown SD,**  
40 **Salmond GPC.** 2013. Draft genome sequence of *Serratia* sp. strain ATCC 39006, a

41 model bacterium for analysis of the biosynthesis and regulation of prodigiosin, a  
42 carbapenem, and gas vesicles. *Genome Announc.* **1**:e01039–13.

43 **10. Bell KS, Sebaihia M, Pritchard L, Holden MT, Hyman LJ, Holeva MC, Thomson**  
44 **NR, Bentley SD, Churcher LJ, Mungall K, Atkin R, Bason N, Brooks K,**  
45 **Chillingworth T, Clark K, Doggett J, Fraser A, Hance Z, Hauser H, Jagels K,**  
46 **Moule S, Norbertczak H, Ormond D, Price C, Quail MA, Sanders M, Walker D,**  
47 **Whitehead S, Salmond GP, Birch PR, Parkhill J, Toth IK.** 2004. Genome  
48 sequence of the enterobacterial phytopathogen *Erwinia carotovora* subsp. *atroseptica*  
49 and characterization of virulence factors. *Proc. Natl. Acad. Sci. U. S. A.* **101**:11105-  
50 11110.

51 **11. Ramsay JP, Williamson NR, Spring DR, Salmond GPC.** 2011. A quorum-sensing  
52 molecule acts as a morphogen controlling gas vesicle organelle biogenesis and  
53 adaptive flotation in an enterobacterium. *Proc. Natl. Acad. Sci. U. S. A.* **108**:14932-  
54 14937.

55

56

57

58

59

60

61

62

63

64

65

66 **Supplementary Figures**

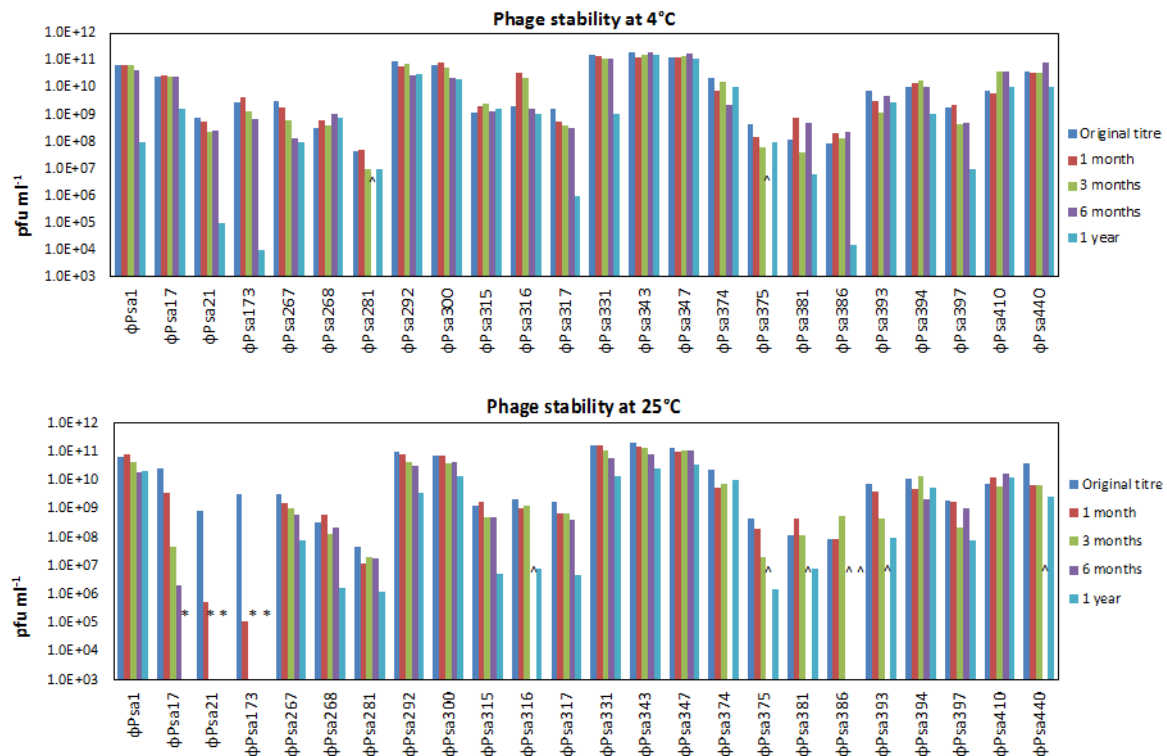

67

68 **FIG S1** *P. syringae* pv. *actinidiae* phages are generally stable for at least one year. Phage  
 69 lysates were prepared and the original titres determined, the lysates were then split in two and  
 70 stored at 4°C or 25°C and titres (pfu ml<sup>-1</sup>) calculated at the times indicated. \* below the  
 71 detection level of 10<sup>3</sup> pfu ml<sup>-1</sup>, ^ not tested.

72

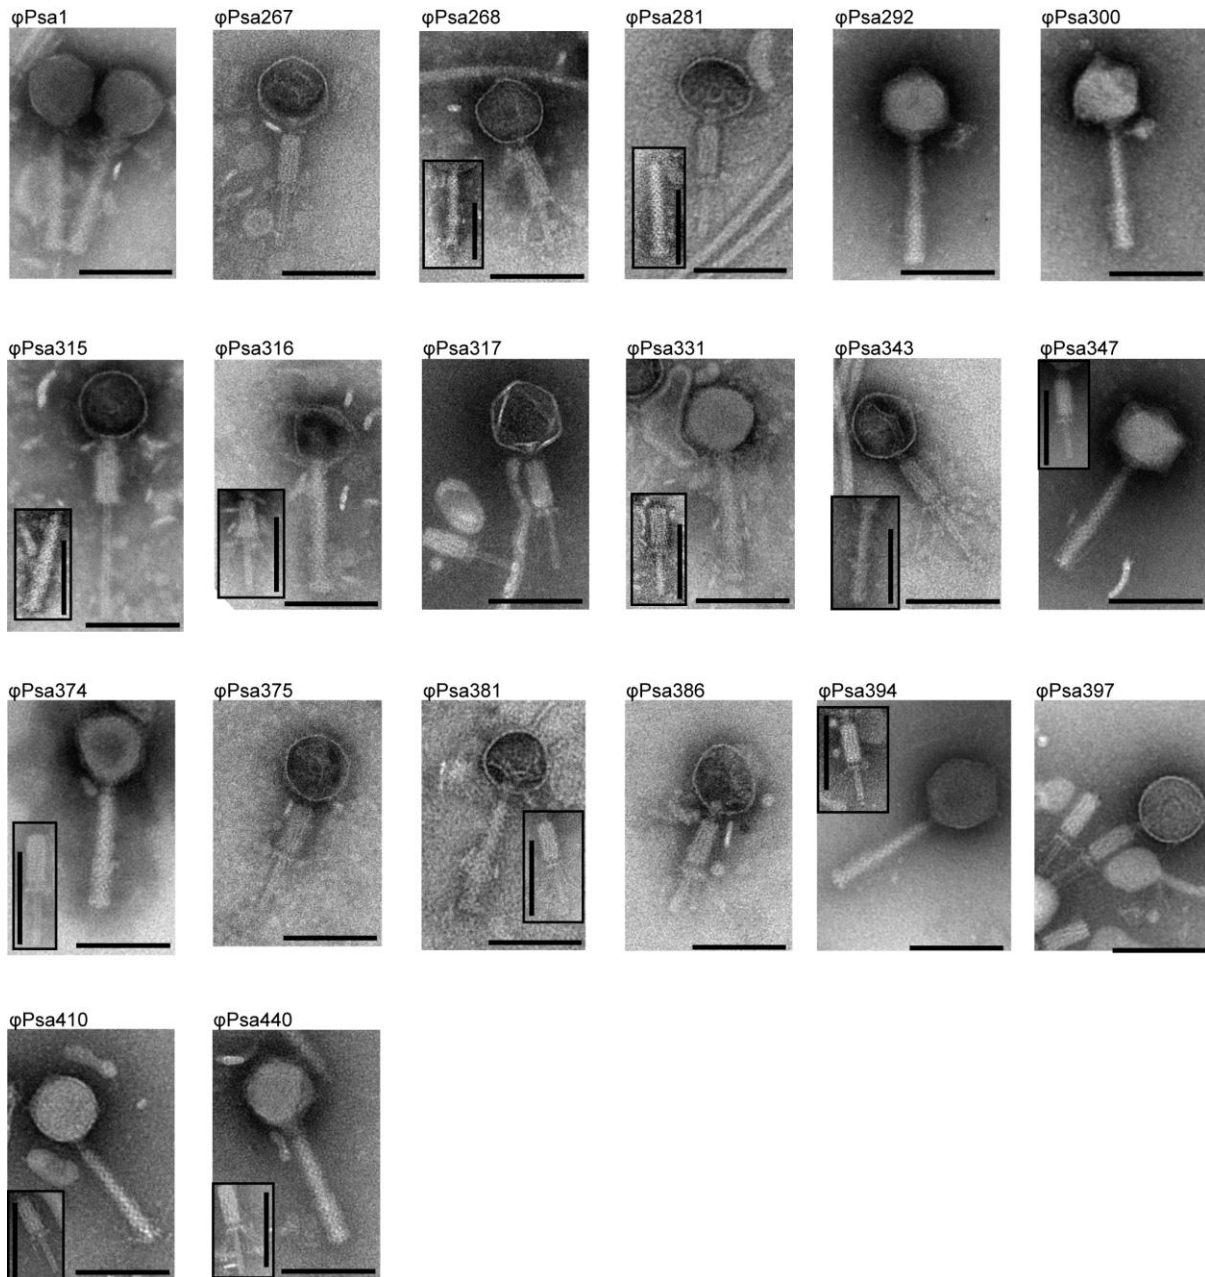

73

74 **FIG S2** Morphologies of 20 *Myoviridae* phages active against *P. syringae* pv. *actinidiae*.

75 Phage lysates were stained with 1% phosphotungstic acid (pH 6.8) and viewed using a

76 Philips CM100 TEM. All images were taken at 135 kV and scale bars represent 100 nm. The

77 insets represent alternative tail morphologies that were observed (extended or contracted).

78 Details of the measurements and classifications are provided in Table 2.

79



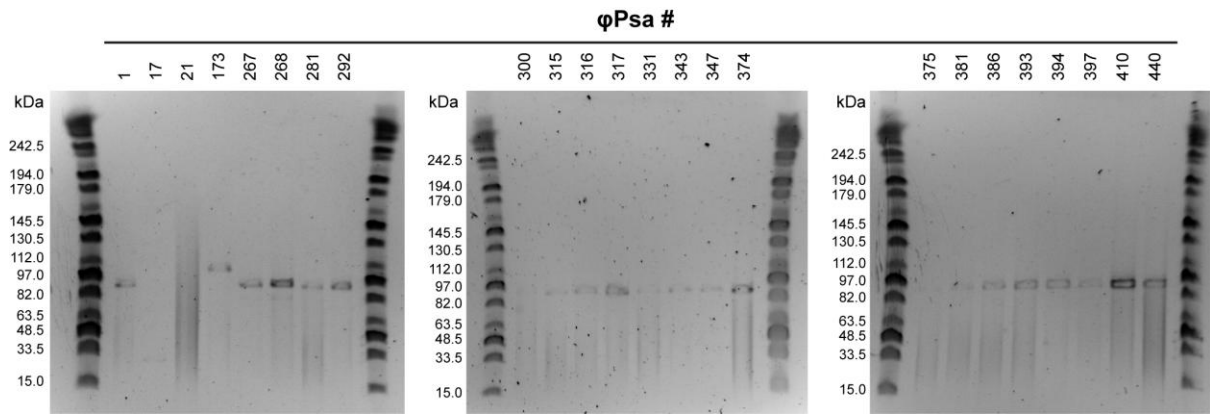

80

81

82 **FIG S3** Estimated genome sizes of 24 phages infecting *P. syringae* pv. *actinidiae* using

83 pulsed field gel electrophoresis. Midrange PFGE Marker I (Biolabs) was used as a size

84 standard. The genome size of φPsa21 could not be resolved.

85

86
